# Supplementary material
Source: PubMed Central journal article supplement (PMC2885543)
Supplement: NIHMS192521-supplement-01.pdf [file NIHMS192521-supplement-01.pdf]

Title: Predictors of Longitudinal Substance Use and Mental Health Outcomes for Patients in Two Integrated Service Delivery Systems

Authors: Christine E. Grella, Judith A. Stein, Constance Weisner, Felicia Chi, and Rudolf Moos

Supplemental Material: Scaling and means (SD) of comparable variables across two study datasets

This material supplements but does not replace the content of the peer-reviewed paper published in Drug and Alcohol Dependence".

Authors should ensure that the journal article contains at least one footnote referring to the Supplementary Material.

Scaling and means (SD) of comparable variables across two study datasets

| Variable name                       | VA wording and range<br>(N = 401)                                                                                                                                                                                                               | Mean/SD      | HMO wording and range<br>(N = 331)                                                                                                                                                                                                                       | Mean/SD      |
|-------------------------------------|-------------------------------------------------------------------------------------------------------------------------------------------------------------------------------------------------------------------------------------------------|--------------|----------------------------------------------------------------------------------------------------------------------------------------------------------------------------------------------------------------------------------------------------------|--------------|
| <b>Baseline variables</b>           |                                                                                                                                                                                                                                                 |              |                                                                                                                                                                                                                                                          |              |
| Married (no/yes)                    | 0-1                                                                                                                                                                                                                                             | 0.18 (0.39)  | 0-1                                                                                                                                                                                                                                                      | 0.38 (0.49)  |
| Black (no/yes)                      | 0-1                                                                                                                                                                                                                                             | 0.51 (0.50)  | 0-1                                                                                                                                                                                                                                                      | 0.08 (0.28)  |
| Employed full or part-time (no/yes) | Were you employed at the time you were admitted to this program?* (0-1)                                                                                                                                                                         | 0.23 (0.42)  | Which best describes your work situation now?* (0-1)                                                                                                                                                                                                     | 0.62 (0.49)  |
| Age (years)                         | Same (23-75 years)                                                                                                                                                                                                                              | 41.34 (7.72) | Same (18-64)                                                                                                                                                                                                                                             | 37.43 (9.98) |
| Drug-related problems (0-4)         | In the past 3 months how often have you had any of these problems as a result of your drinking and/or drug use? Mean of 18 problems (health, job, legal, family, money, etc.) 0 = never, 1 = seldom, 2 = sometimes, 3 = fairly often, 4 = often | 1.49 (0.69)  | Single items: How troubled have you been by alcohol problems in the last 30 days, or, how troubled have you been by drug problems in the last 30 days. Higher score used. 0 = not at all, 1 = slightly, 2 = moderately, 3 = considerably, 4 = extremely. | 2.68 (1.47)  |
| Cocaine (1-5)                       | Mean of inject, snort, use crack. 1 = never, 2 = less than once a week, 3 = 1-3 days a week, 4 = 4-6 days a week, 5 = every day.                                                                                                                | 1.57 (0.68)  | Mean of inject, snort, use crack. During the past 30 days, on how many days did you use any cocaine or crack?*                                                                                                                                           | 1.24 (0.69)  |

| Appendix A: Scaling and means (SD) of comparable variables across two study datasets, Continued. |                                                                               |               |                                                                                                         |                |
|--------------------------------------------------------------------------------------------------|-------------------------------------------------------------------------------|---------------|---------------------------------------------------------------------------------------------------------|----------------|
| Variable name                                                                                    | VA wording and range<br>(N = 401)                                             | Mean/SD       | HMO wording and range<br>(N = 331)                                                                      | Mean/SD        |
| Alcohol latent variable                                                                          | Regular drinking (amount of days)                                             | 13.22 (11.81) | During the past 30 days, on how many days did you drink any alcohol?                                    | 11.73 (10.62)  |
|                                                                                                  | Maximum use                                                                   | 19.50 (15.21) | During the past 30 days, on how many days                                                               | 8.37 (10.74)   |
|                                                                                                  | Amount use per day                                                            | 11.10 (11.81) | did you have at least 5 drinks                                                                          |                |
| <b>Year 1</b>                                                                                    |                                                                               |               |                                                                                                         |                |
| Drug-related problems (0-4)                                                                      | Same as above                                                                 | 0.81 (0.84)   | Same as above                                                                                           | 0.81 (1.29)    |
| Cocaine (1-5)                                                                                    | Same as above                                                                 | 1.24 (0.46)   | Same as above                                                                                           | 1.02 (0.15)    |
| Alcohol latent variable                                                                          | Same as above                                                                 | 5.82 (9.88)   | Same as above                                                                                           | 3.12 (7.23)    |
|                                                                                                  |                                                                               | 8.46 (12.80)  |                                                                                                         | 1.11 (4.29)    |
|                                                                                                  |                                                                               | 4.55 (9.14)   |                                                                                                         |                |
| Depression Anxiety latent variable                                                               | Last 3 months, BSI subscales (1 = not at all, 5 = extremely)<br>range = 0-24. | 9.38 (6.28)   | During the past 30 days, has there been a period of time when you experienced serious depression? (1-2) | 1.34 (0.46)    |
|                                                                                                  |                                                                               | 8.31 (6.08)   | Experienced serious anxiety or tension (1-2)                                                            | 1.42 (0.48)    |
| <b>Year 5</b>                                                                                    |                                                                               |               |                                                                                                         |                |
| Drug-related problems (0-4)                                                                      | Same as above                                                                 | 0.69 (0.84)   | Same as above                                                                                           | 0.50 (1.13)    |
| Cocaine                                                                                          | Same as above                                                                 | 1.18 (0.44)   | Same as above                                                                                           | 1.01 (0.08)    |
| Alcohol latent variable                                                                          | Same as above                                                                 | 4.69 (8.26)   | Same as above                                                                                           | 3.63 (6.89)    |
|                                                                                                  |                                                                               | 6.46 (10.31)  |                                                                                                         | 1.25 (4.00)    |
|                                                                                                  |                                                                               | 3.20 (6.58)   |                                                                                                         |                |
| Depression Anxiety latent variable                                                               | Same as above                                                                 | 9.16 (6.73)   | Same as above                                                                                           | 1.30 (0.46)    |
|                                                                                                  |                                                                               | 7.99 (6.51)   |                                                                                                         | 1.42 (0.49)    |
| <b>Service delivery</b>                                                                          |                                                                               |               |                                                                                                         |                |
| Time in treatment                                                                                | Days (2-80)                                                                   | 24.80 (8.93)  | Days (0-428)                                                                                            | 76.91 (100.17) |
| Continuing care                                                                                  | Days (0-281)                                                                  | 17.10 (35.10) | Days (0-113)                                                                                            | 7.89 (16.86)   |

| Appendix A: Scaling and means (SD) of comparable variables across two study datasets, Continued. |                                                                                                                                 |                |                                                                                                                                          |                |
|--------------------------------------------------------------------------------------------------|---------------------------------------------------------------------------------------------------------------------------------|----------------|------------------------------------------------------------------------------------------------------------------------------------------|----------------|
| <b>Variable name</b>                                                                             | <b>VA wording and range<br/>(N = 401)</b>                                                                                       | <b>Mean/SD</b> | <b>HMO wording and range<br/>(N = 331)</b>                                                                                               | <b>Mean/SD</b> |
| Psych visits                                                                                     | Mental health service visits post-index until Year 1 (0-83)                                                                     | 4.21 (10.12)   | Mental health service visits post-index until Year 1 (0-107)                                                                             | 4.70 (8.59)    |
| 12-step/self-help participation (0-4)                                                            | In the past 3 months, how many A.A./N.A./C.A. meetings did you attend? 0 = none, 1 = 1-9, 2 = 10-19, 3 = 20-29, 4 = 30 or more. | 1.31 (1.49)    | In the past 30 days, on how many days did you attend any self-help meetings for alcohol or drug problems. (extrapolated using VA scale*) | 1.83 (1.67)    |

\* items rescaled to equivalence
